# Supplementary material
Source: publisher figshare collection journal article supplement (https://brill.figshare.com/ndownloader/files/23293631)

## Short Note

# Home range and habitat use of two sympatric crocodylians (*Melanosuchus niger* and *Caiman yacare*) under changing habitat conditions

Paola De la Quintana<sup>1,2,\*</sup>, James Aparicio<sup>1,2</sup>, Luis F. Pacheco<sup>1,2</sup>

1 - Red de Investigadores en Herpetología, La Paz, Bolivia

2 - Colección Boliviana de Fauna, Instituto de Ecología, Carrera de Biología, Universidad Mayor de San Andrés, La Paz, Bolivia

\*Corresponding author; e-mail: paola.d.c.1186@gmail.com

## Supplementary material

**Table S1.** Characteristics of habitats determined in the study area.

| Habitat             | Description                                                                                                                                                                                                                                   |
|---------------------|-----------------------------------------------------------------------------------------------------------------------------------------------------------------------------------------------------------------------------------------------|
| Open water          | Sector without vegetation usually because of the water current. Depth range: 80 to 205 cm.                                                                                                                                                    |
| Islands             | The heterogeneous sector formed by Islands of plants ( <i>Hymenachne</i> and / or <i>Eichhornia</i> ). These Islands are interspersed with Open water areas, which changed their location or size over the months. Depth range: 40 to 200 cm. |
| Flooded forest      | Sector of the forest that was invaded by water, without aquatic grasses. Depth range: 150 to 180 cm.                                                                                                                                          |
| Swamp of cyperaceae | Predominantly covered by aquatic grasses, mainly <i>Panicum</i> , <i>Hymenachne</i> , <i>Oxycarium</i> and <i>Paspalum</i> . Accessing this habitat type with a boat is highly difficult. Depth range: 140 to 260 cm.                         |
| Beach               | Area formed by the sediment trawl that accumulates over time and dries slowly forming muddy areas. Depth range: 0 to 20 cm.                                                                                                                   |
| Flooded grassland   | Herbs of <i>Hymenachne donacifolia</i> and/or <i>Hymenachne amplexicaulis</i> semi-floating, uniform and large, they can be in shallow water and are floating in deeper water. Depth range: 90 to 210 cm.                                     |
| Open swampy         | Dry or dead trees completely covered by climbing plants. This type of forest is characterized by forming a shelter on the surface of the water.                                                                                               |

---

forest      Depth range: 150 to 220 cm.

---

**Figure S1.** Changes of the Cedral lagoon according to the gradual invasion of the Maniqui river.

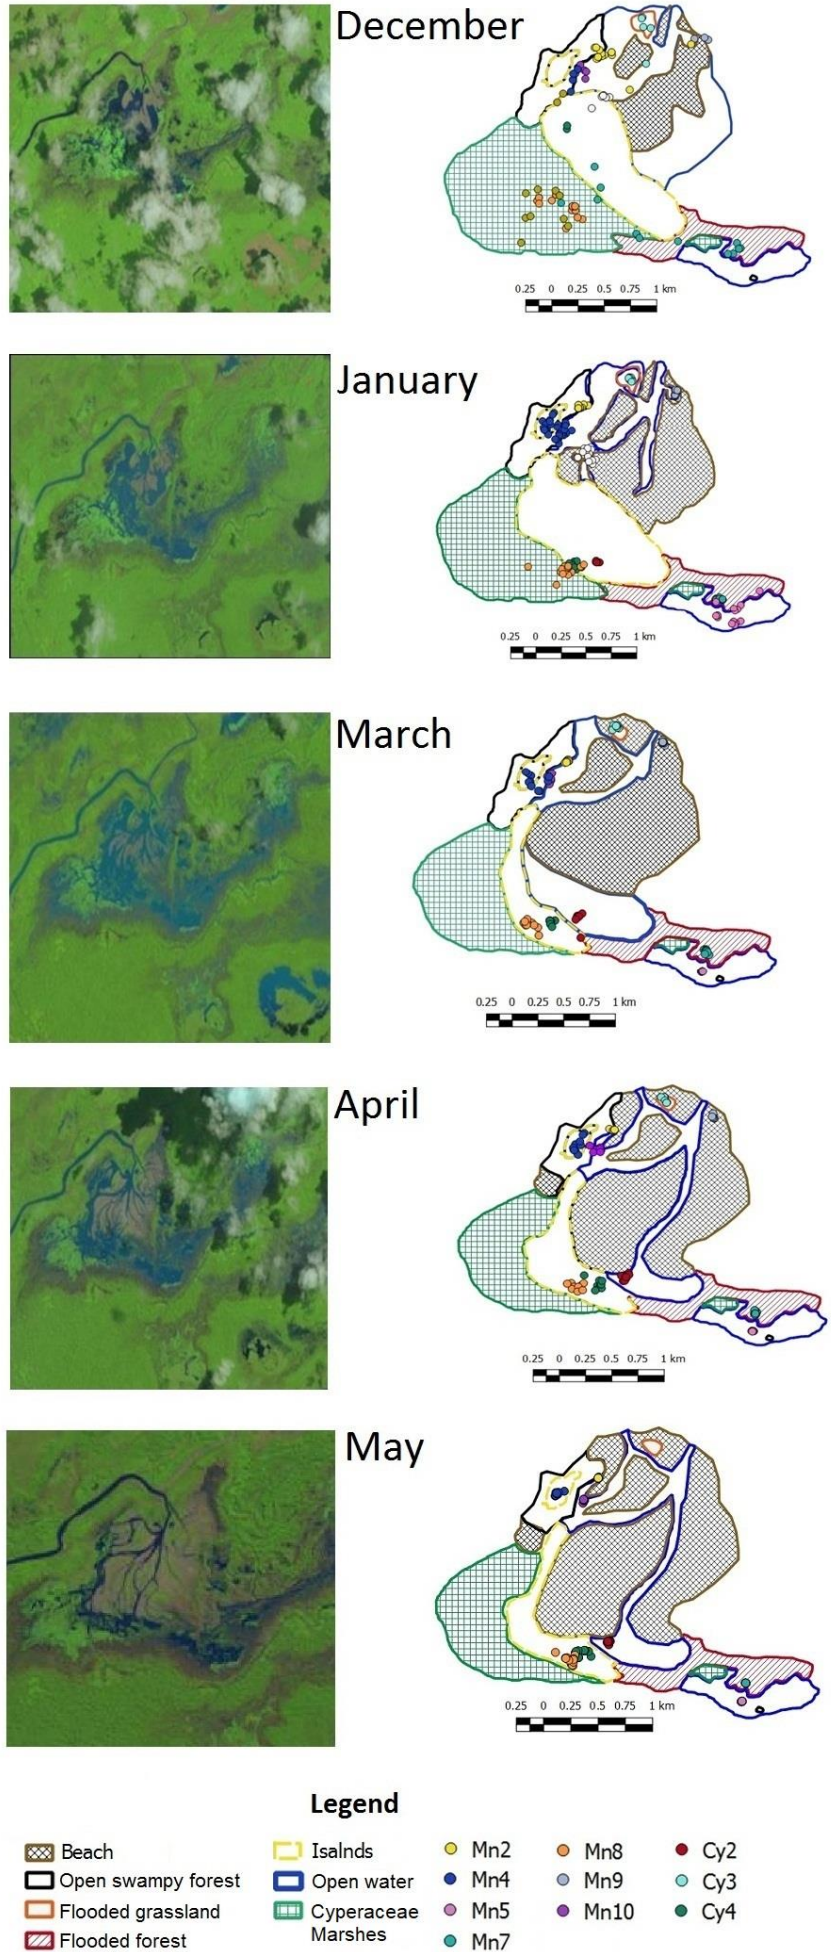

**Figure S2.** Monthly characteristics a) Proportion of each habitat and b) Water depth of the habitats after overflow of the Maniqui River into Cedral Lagoon.

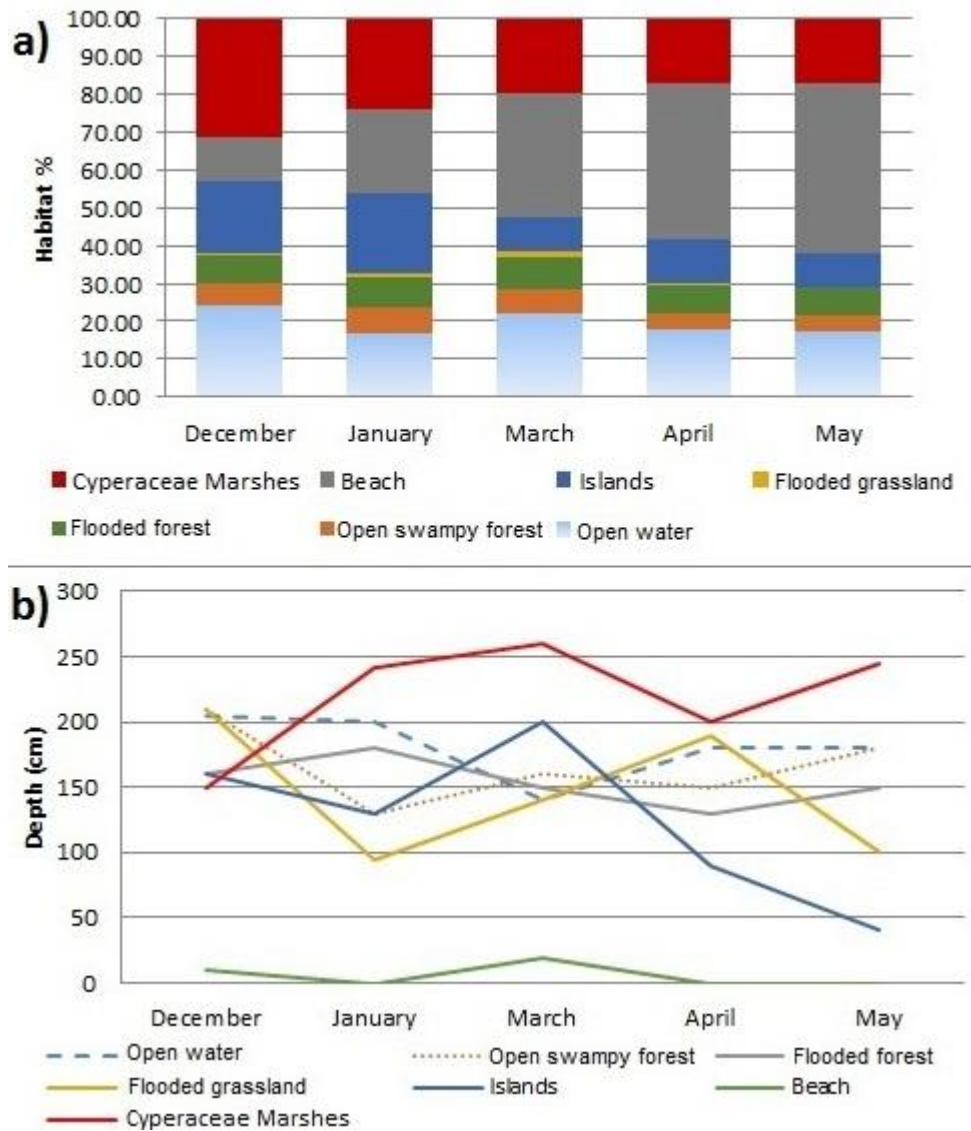

Supplement: Supplementary file 1 [file 23293631]
